# Supplementary material for: Photosynthesis, yield and raw material quality of sugarcane injured by multiple pests
Source: PeerJ. 2019 Jan 18;7:e6166. doi: 10.7717/peerj.6166 (PMC6340350; doi:10.7717/peerj.6166)
Supplement: File S1 [file peerj-07-6166-s001.xls]

## Sheet: Weather Data
Month/Year	Precipitation (mm)	Temperature (°C)	Net radiation (MJ.m⁻²)
Dec/2007	132.8	24.5323	22.19
Jan/2008	359.8	23.3323	18.02
Feb/2008	276	23.7817	19.75
Mar/2008	179	23.1677	18.59
Apr/2008	143.8	22.4119	15.45
May/2008	82	19.3355	14.29
Jun/2008	20.4	18.9689	11.74
Jul/2008	0	19.8	14.99
Aug20/08	21.2	22.2258	16.05
Sep/2008	12.2	21.5363	17.93
